# Supplementary material for: High Salt Cross-Protects Escherichia coli from Antibiotic Treatment through Increasing Efflux Pump Expression
Source: PubMed Central journal article supplement (PMC5909119; doi:10.1128/msphere.00095-18), 2018-04-11
Supplement: sph002182510sf2.pdf [file sph002182510sf2.pdf]

**A**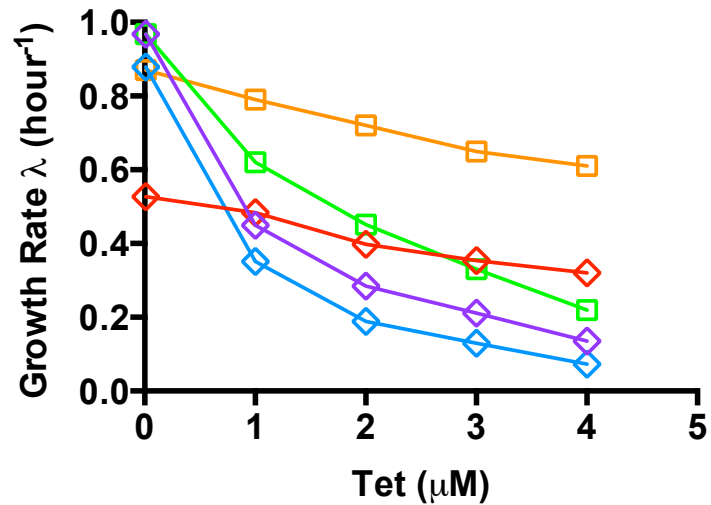**B**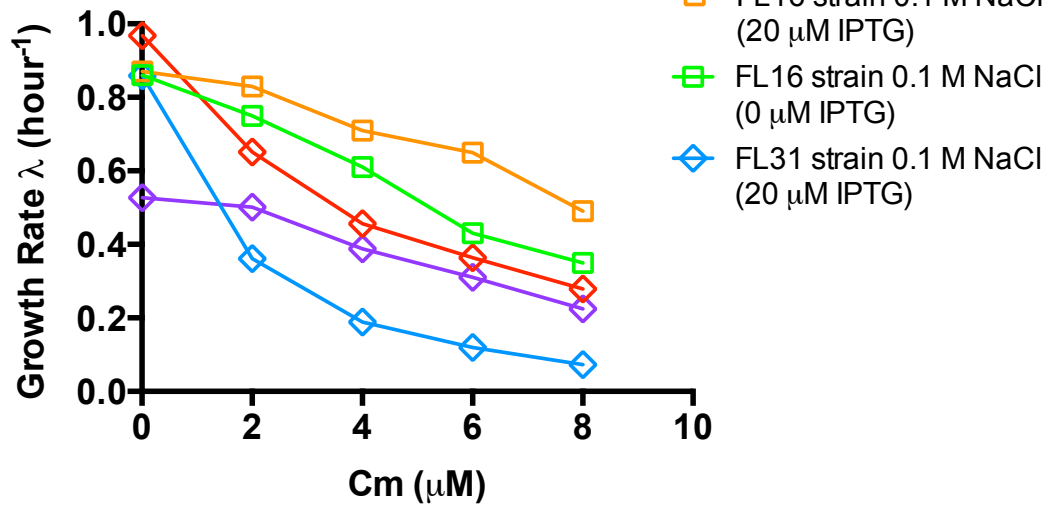

- WT 0.1 M NaCl
- WT 0.4 M NaCl
- FL16 strain 0.1 M NaCl (20  $\mu$ M IPTG)
- FL16 strain 0.1 M NaCl (0  $\mu$ M IPTG)
- FL31 strain 0.1 M NaCl (20  $\mu$ M IPTG)
