# Supplementary material for: High Salt Cross-Protects Escherichia coli from Antibiotic Treatment through Increasing Efflux Pump Expression
Source: PubMed Central journal article supplement (PMC5909119; doi:10.1128/msphere.00095-18), 2018-04-11

**A**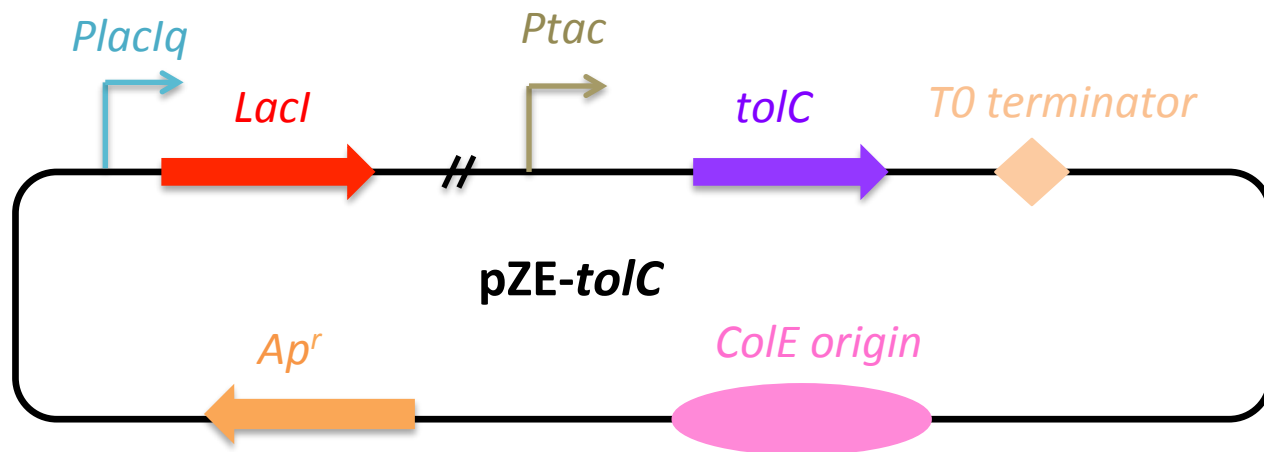**B**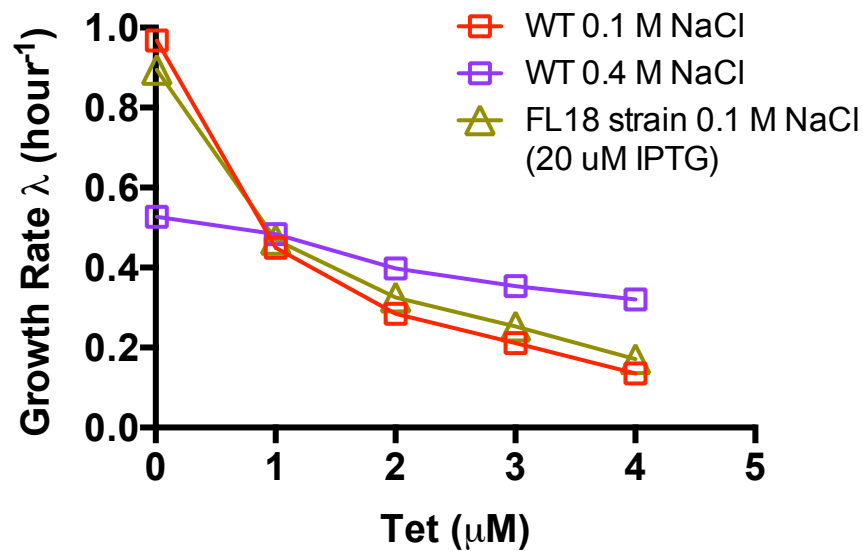**C**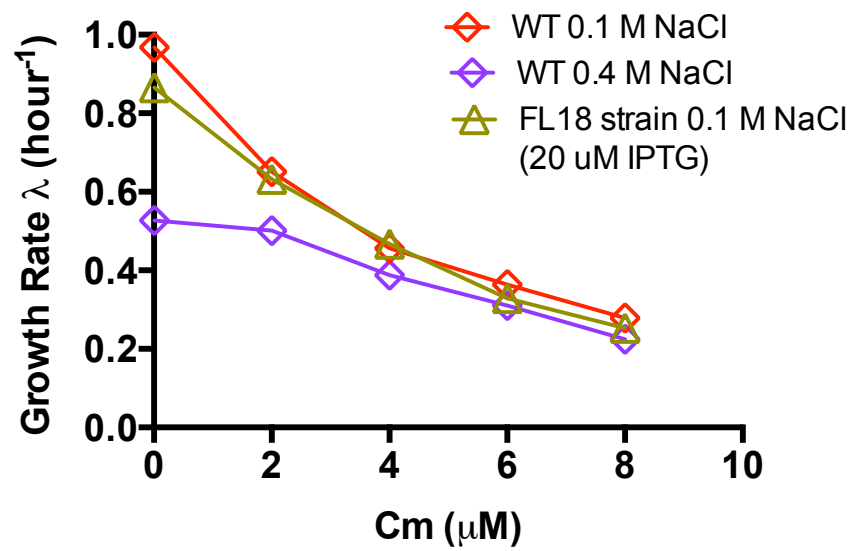

Supplement: sph002182510sf4.pdf [file sph002182510sf4.pdf]
